# Supplementary material for: Repurposing Atovaquone as a Therapeutic against Acute Myeloid Leukemia (AML): Combination with Conventional Chemotherapy Is Feasible and Well Tolerated
Source: MDPI journal article supplement (doi:10.3390/cancers15041344), 2023-02-20

Supplementary Figure S1

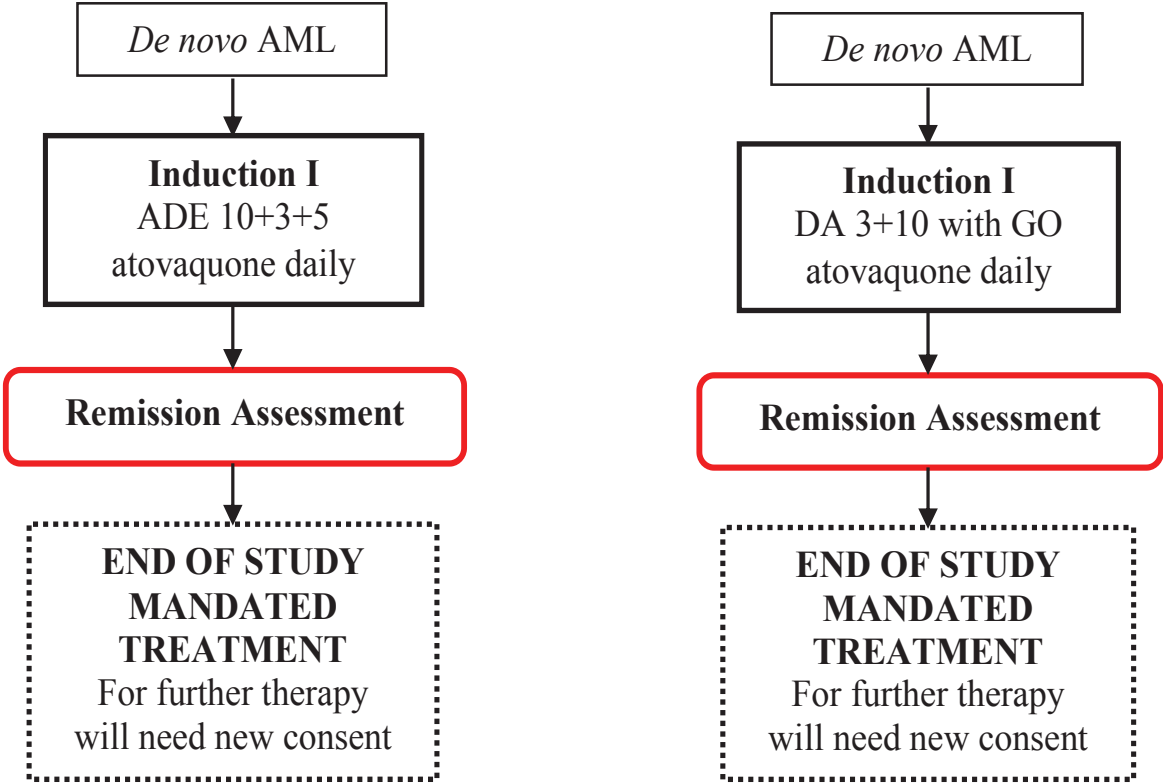

**A**

Page

|  |  |  |
|--|--|--|
|  |  |  |
|--|--|--|

**\*\*Ease of Administration Question:** Based on its taste, smell, and how it felt in the mouth, how easy or difficult was it for you/your child to take this medication today: (Very easy=5, Easy=4, Neither easy or difficult=3, Difficult=2, Very difficult=1).

# B

Version Number: 1.04

Page 1

114

was it for you/your child to take this medication today: (Very easy=5, Easy=4, Neither easy or difficult=3, Difficult=2, Very difficult=1).

Supplementary Figure S3

A

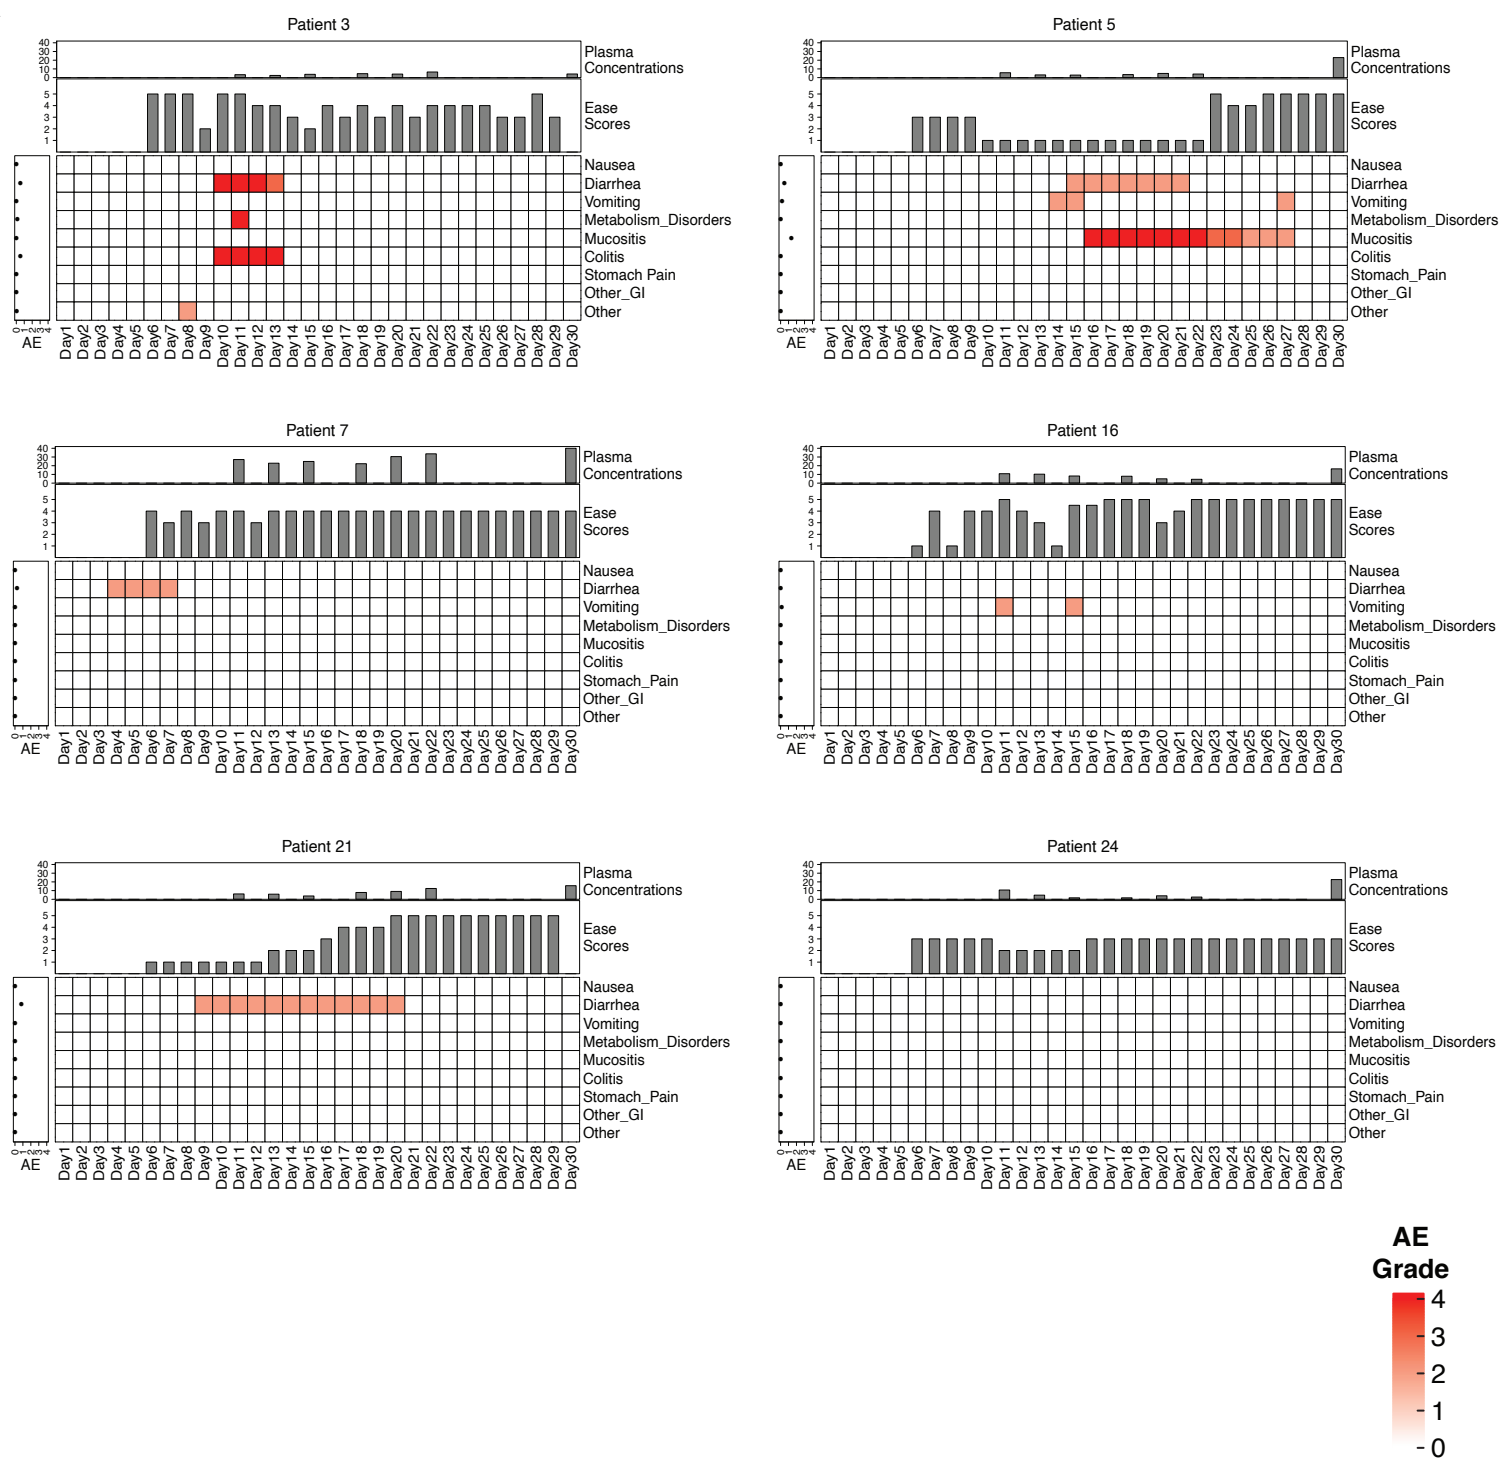

Supplementary Figure S3

B

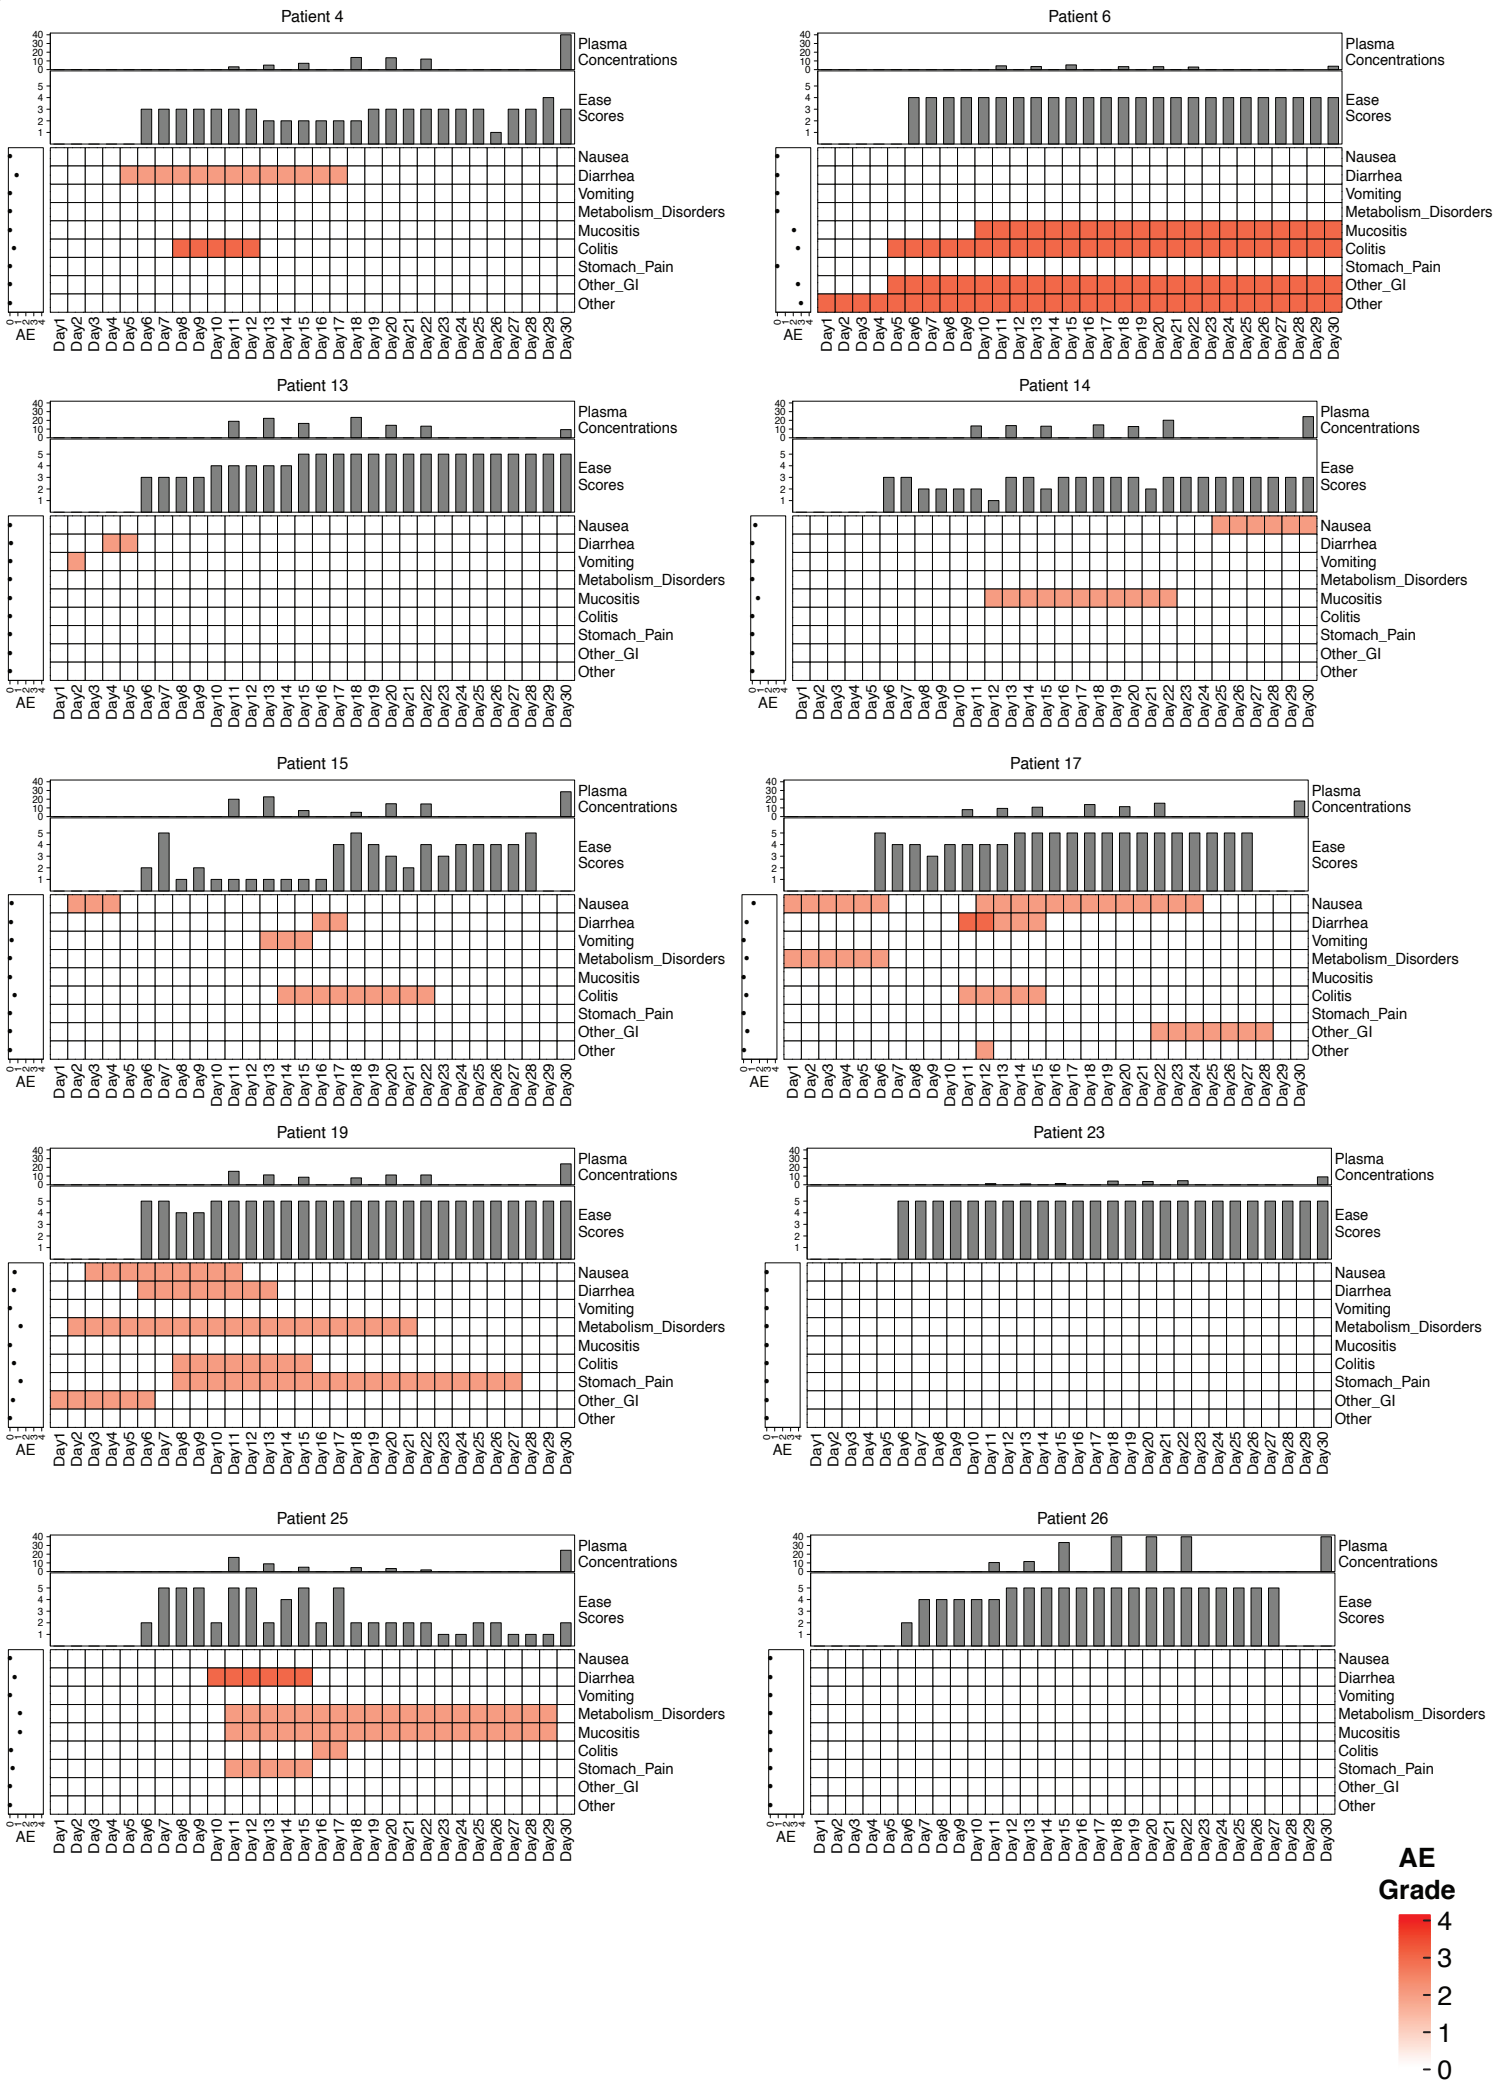

Supplementary Figure S3

C

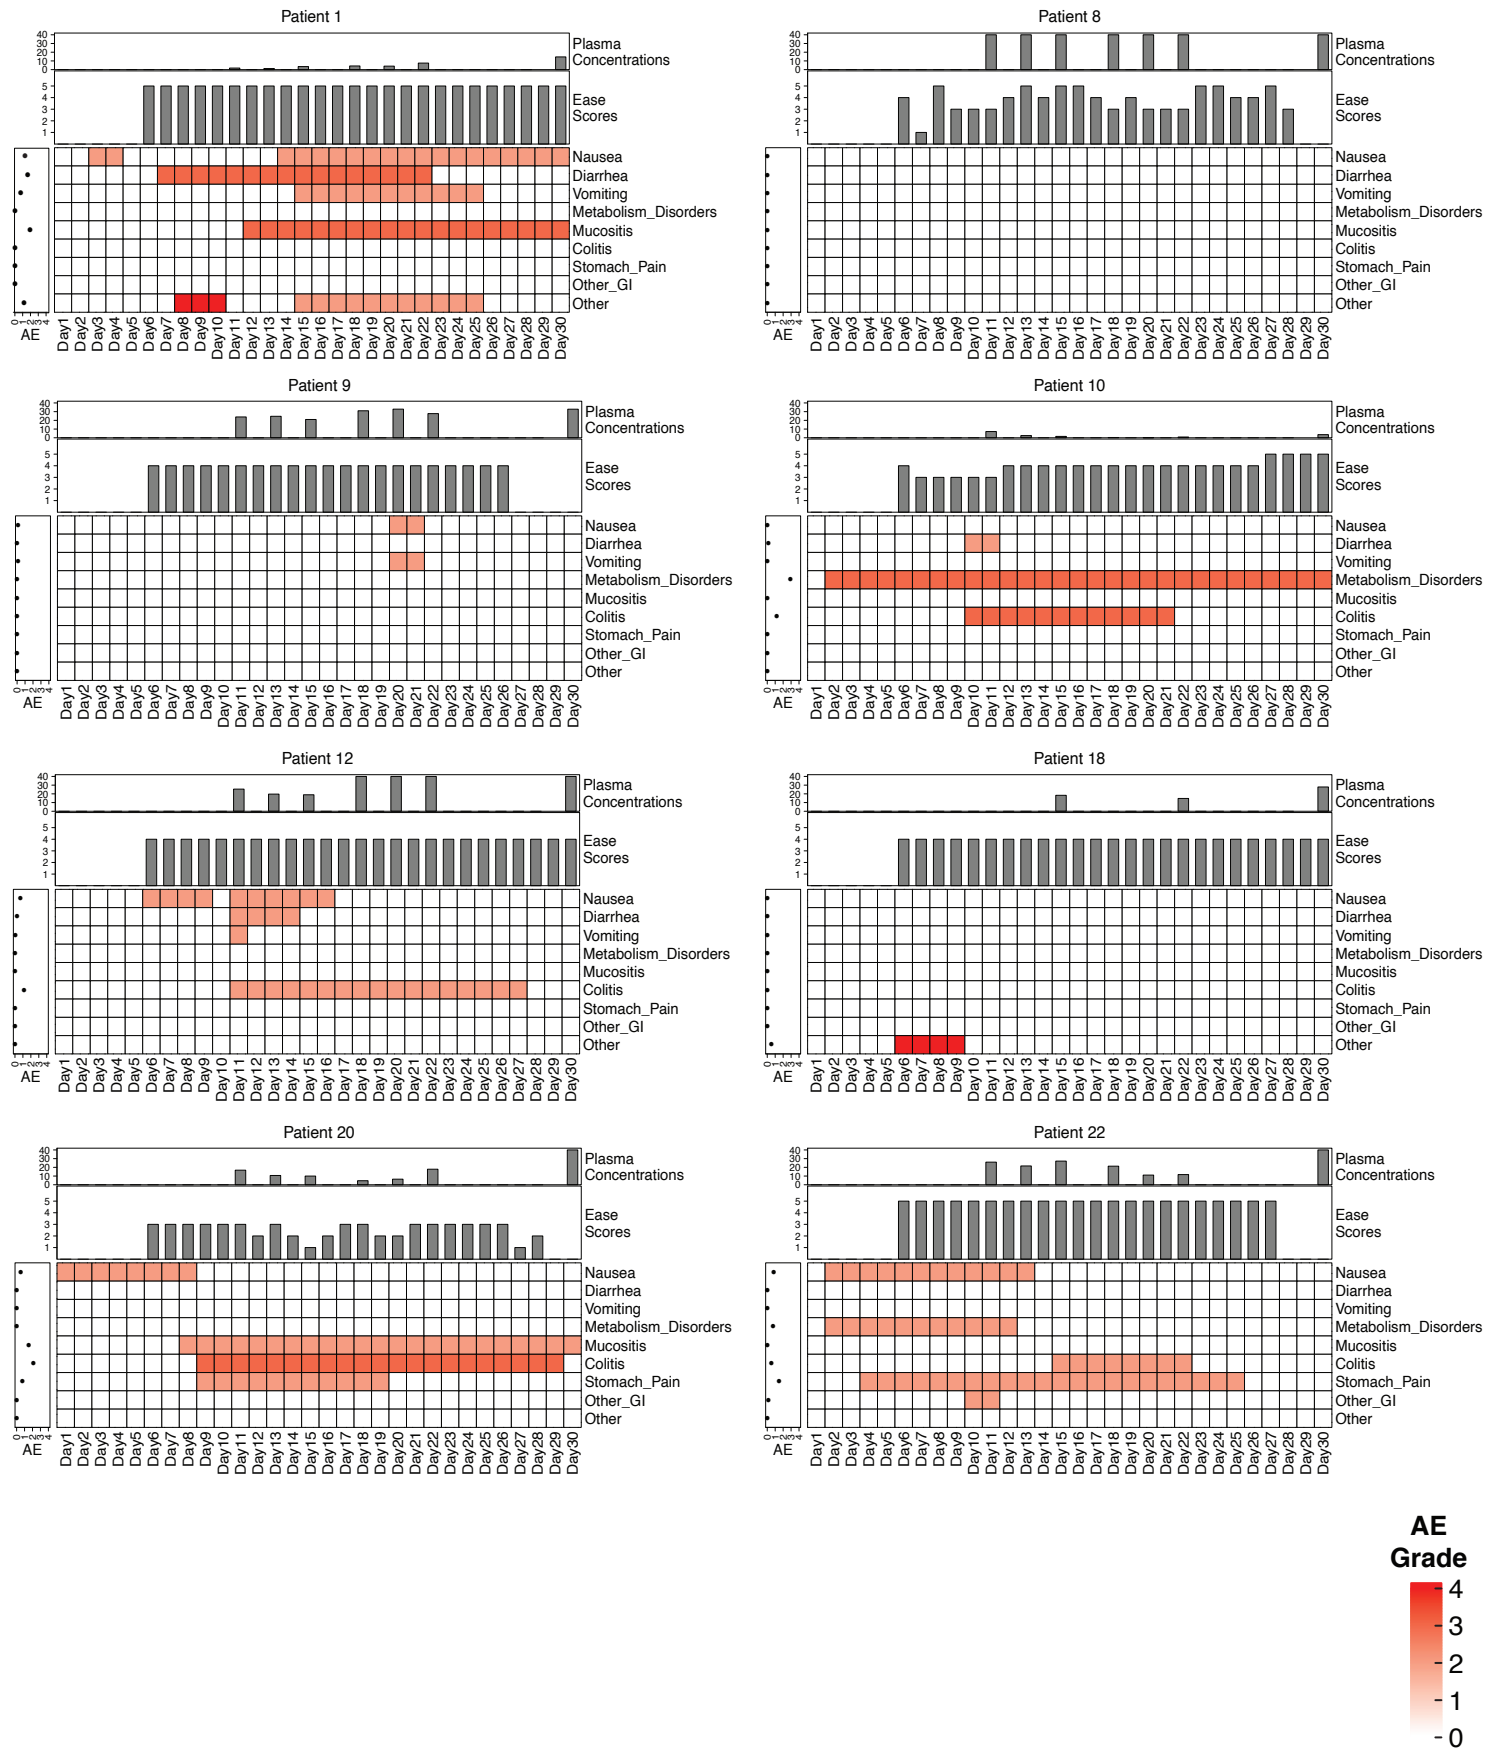

Supplementary Figure S4

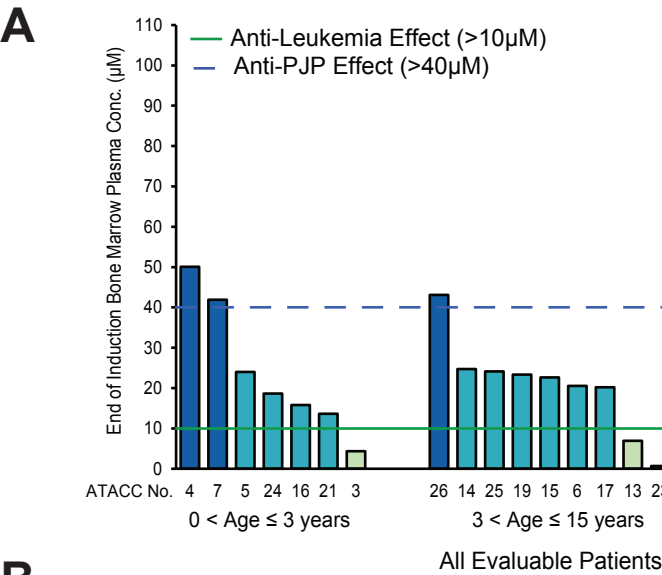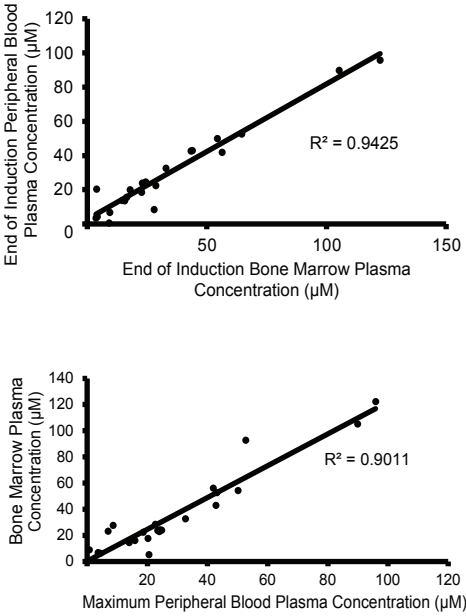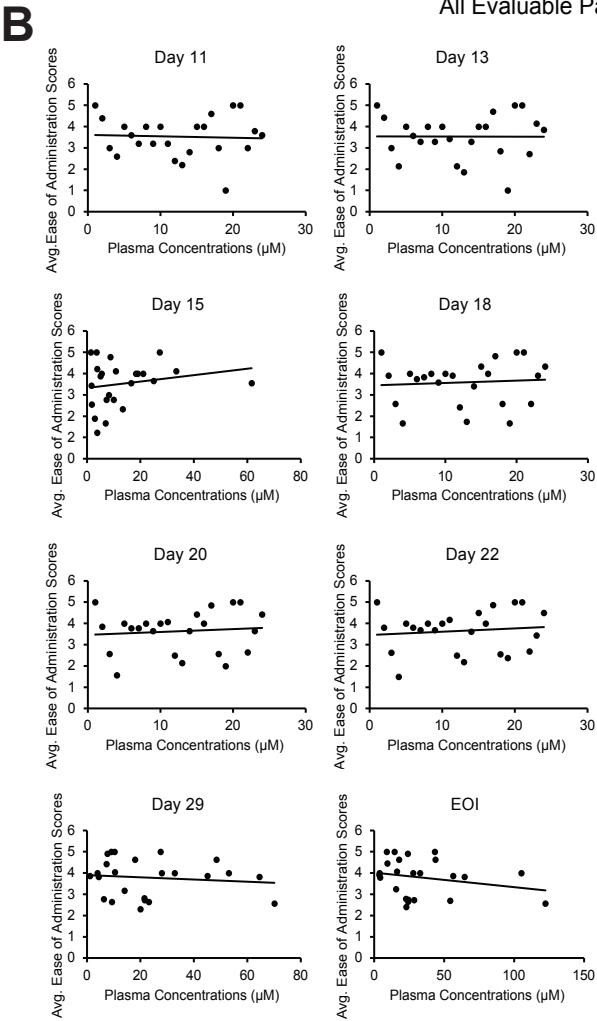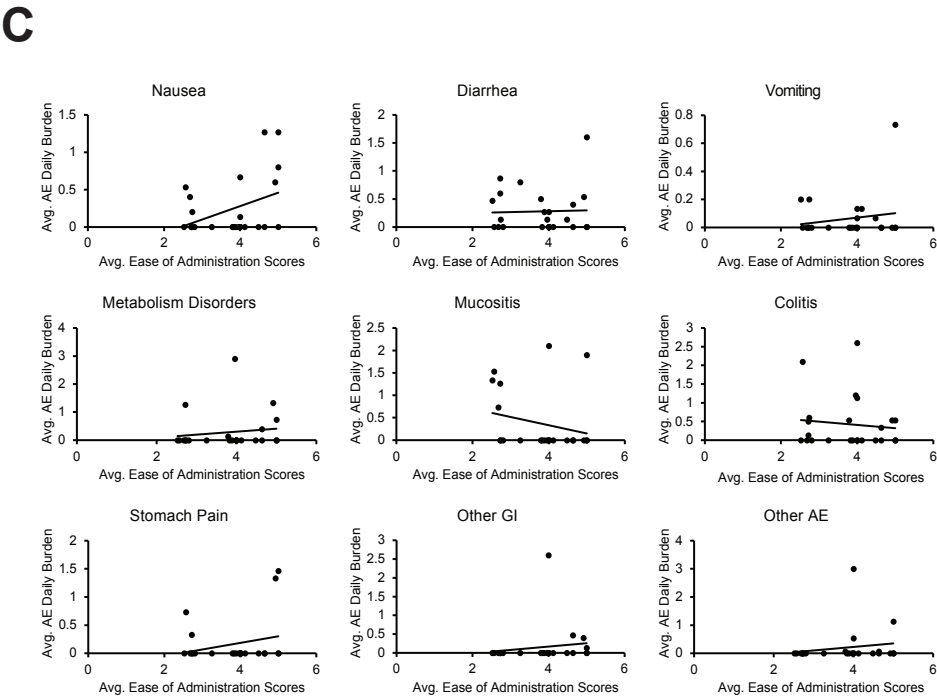

**D**

**Average Ease of Administration Scores vs Average AE Burden**

|                         | Nausea | Diarrhea | Vomiting | Metabolic Disorders | Mucositis | Colitis | Stomach Pain | Other GI | Other |
|-------------------------|--------|----------|----------|---------------------|-----------|---------|--------------|----------|-------|
| Pearson Coefficient (r) | 0.383  | 0.033    | 0.174    | 0.134               | -0.228    | -0.108  | 0.242        | 0.143    | 0.166 |
| P-value                 | 0.064  | 0.877    | 0.417    | 0.533               | 0.285     | 0.616   | 0.254        | 0.505    | 0.439 |

**Average Ease of Administration Scores vs Plasma Concentrations**

|                         | Day 11 | Day 13 | Day 15 | Day 18 | Day 20 | Day 22 | Day 29 | EOI    |
|-------------------------|--------|--------|--------|--------|--------|--------|--------|--------|
| Pearson Coefficient (r) | -0.035 | -0.055 | 0.194  | 0.230  | 0.085  | 0.155  | -0.117 | -0.238 |
| P-value                 | 0.875  | 0.804  | 0.363  | 0.291  | 0.705  | 0.480  | 0.587  | 0.263  |

Supplementary Figure SF5

A

All Patient Samples in Media+FBS

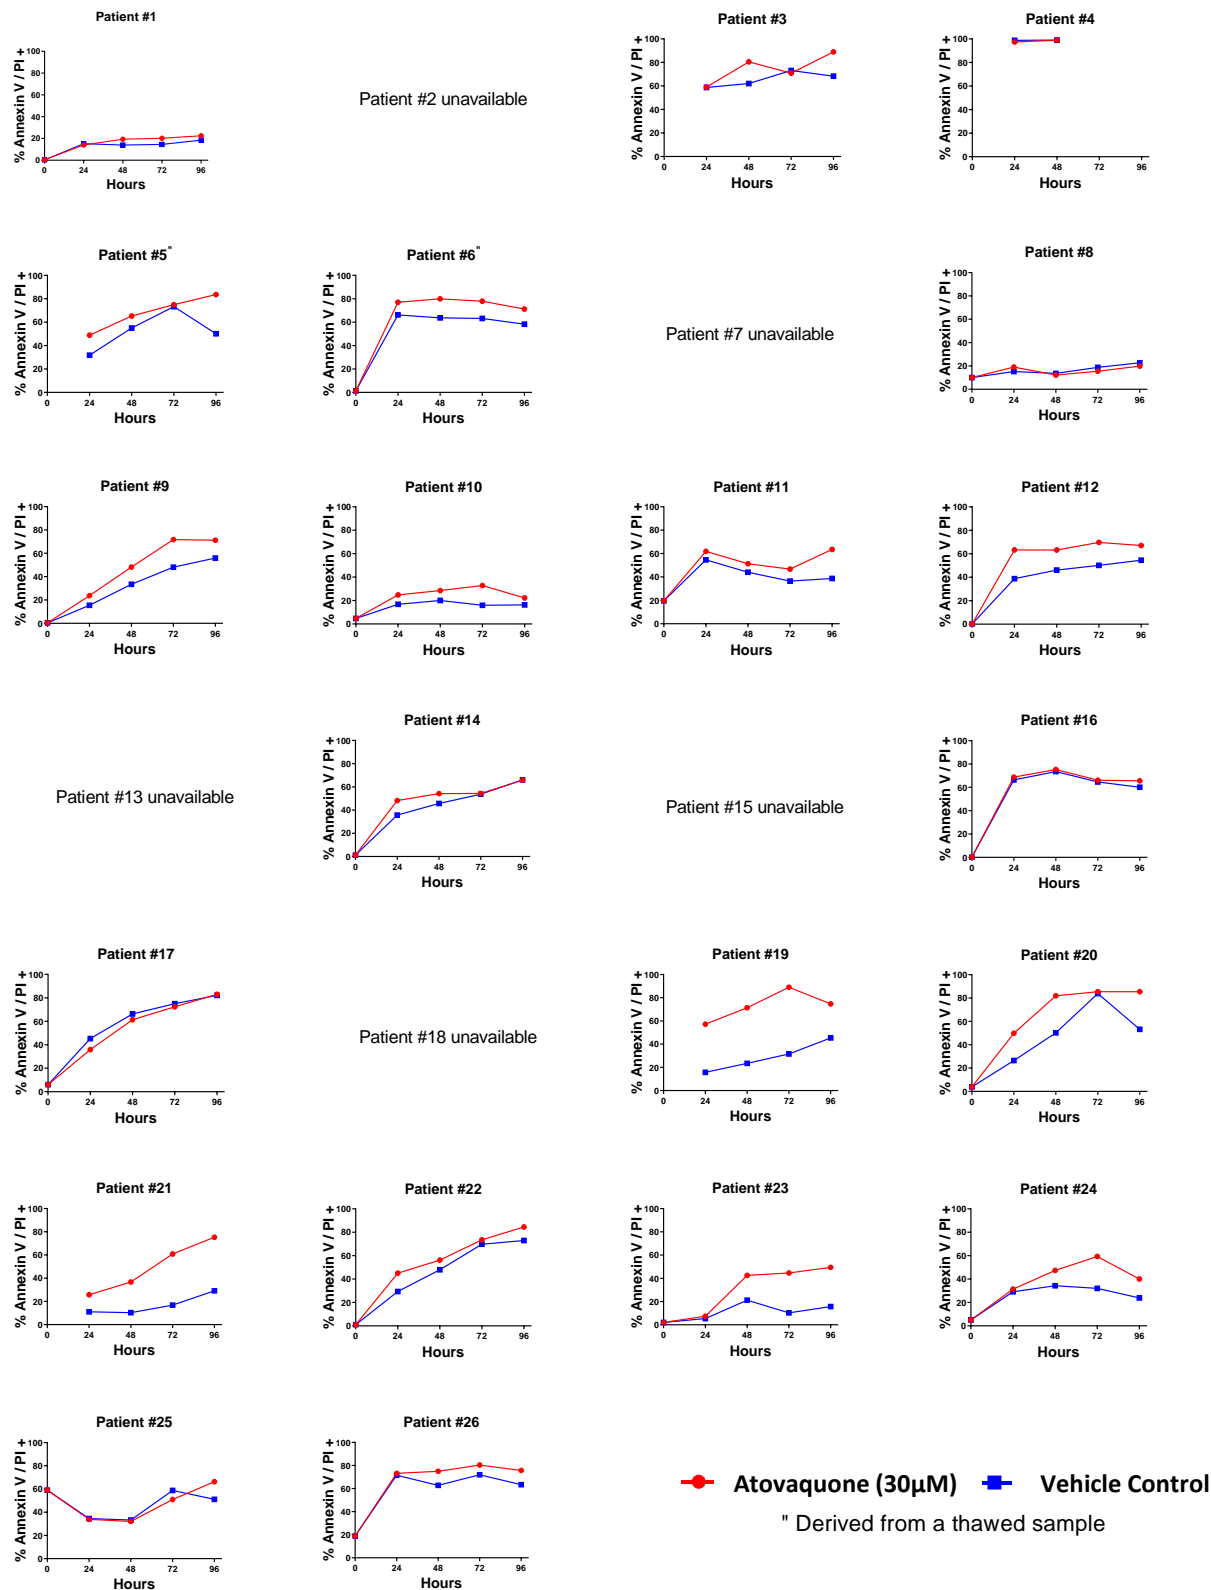

Supplementary Figure SF5

B All Patient Samples in CM

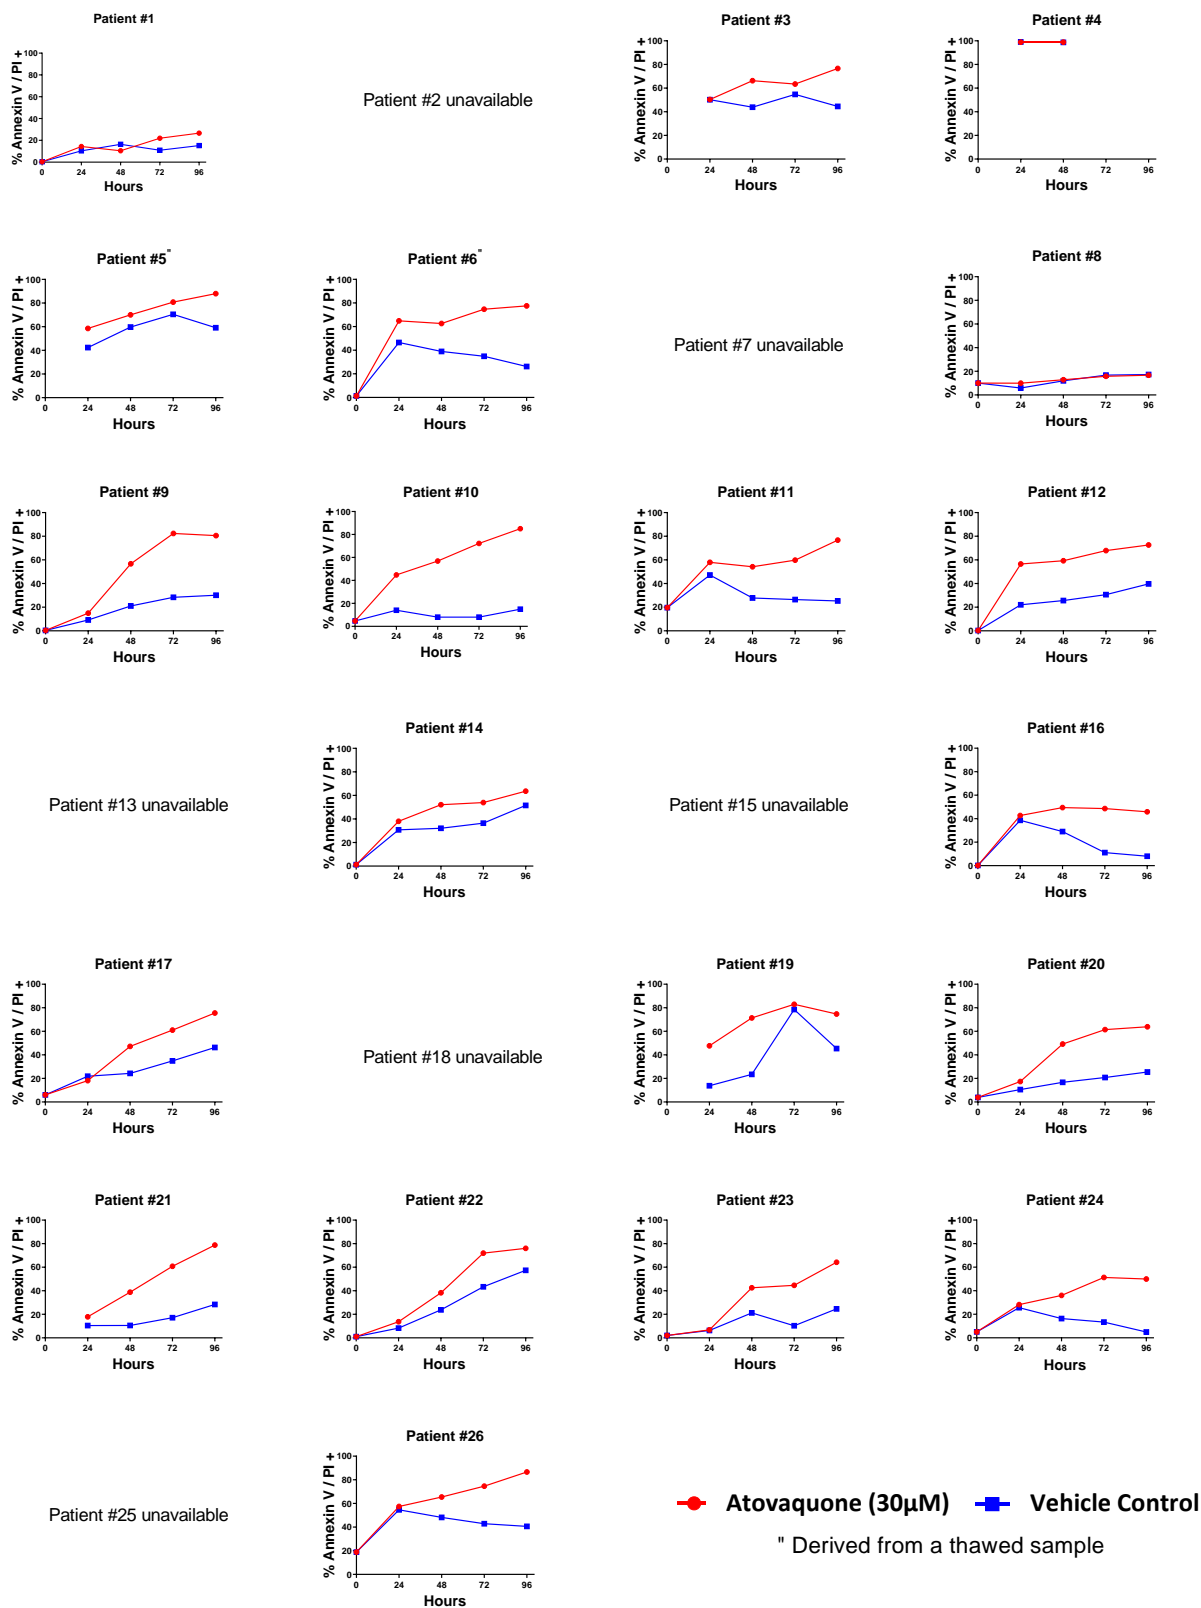



Supplementary Figure SF5

C All Patient Samples in TW

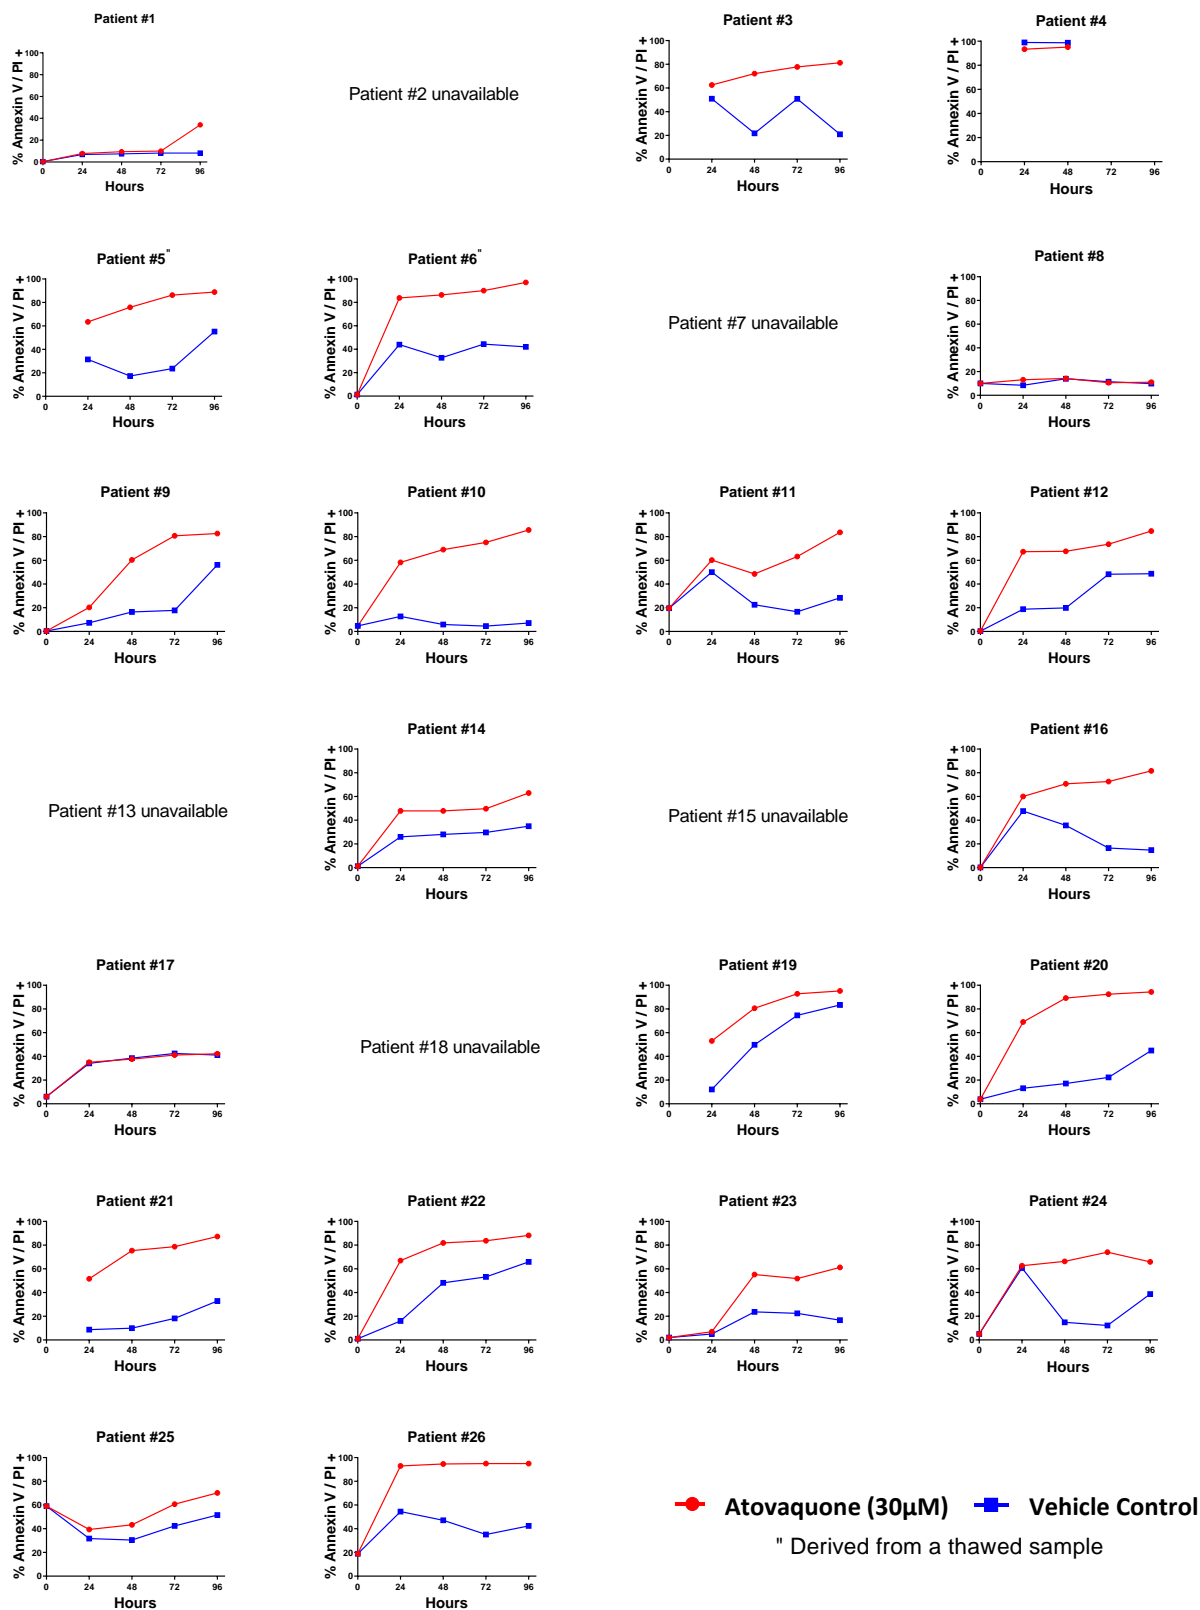

Supplementary Figure SF6

Fresh vs. Thawed Samples

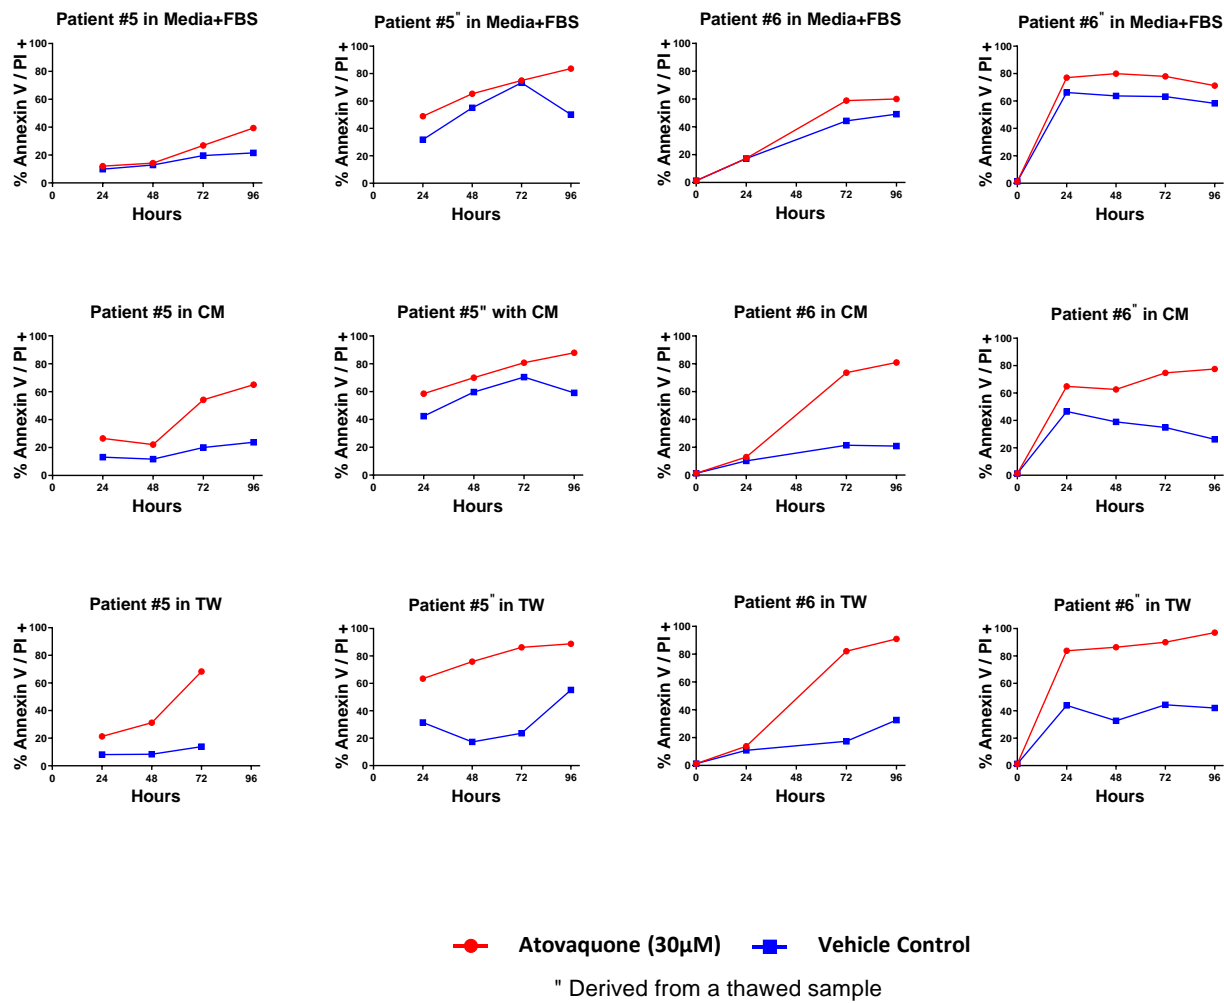

Supplementary Figure SF7

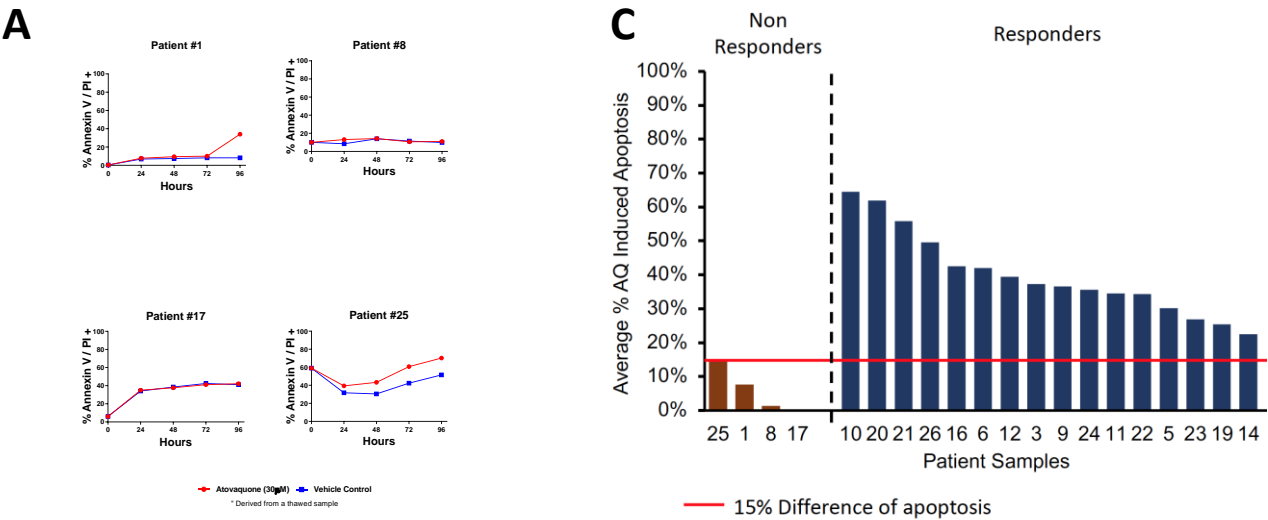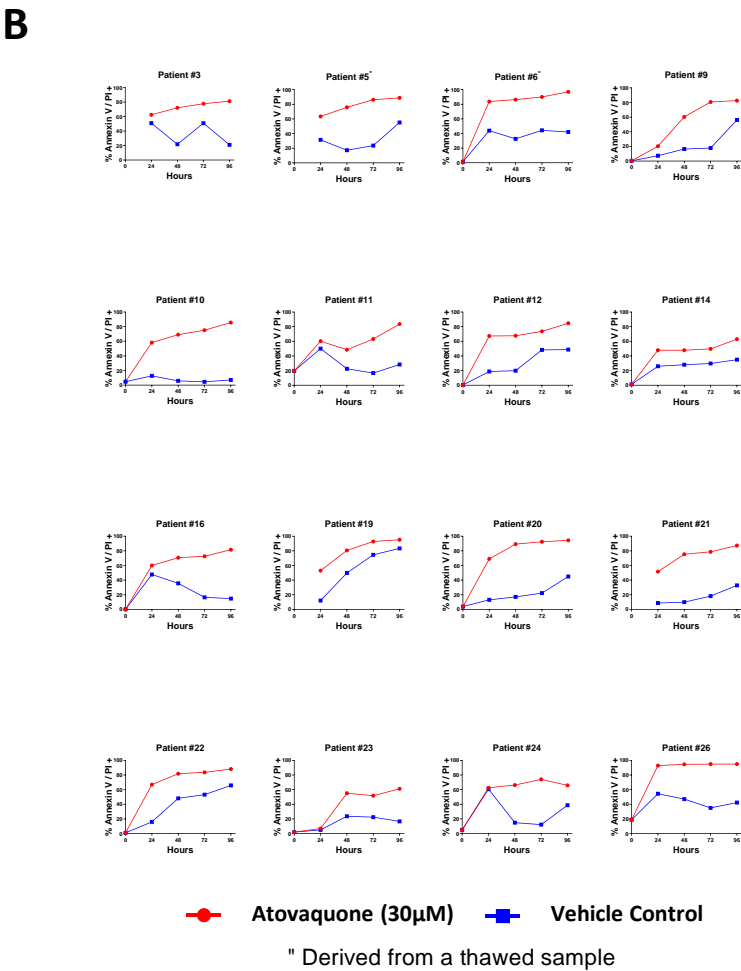

Supplementary Figure SF8

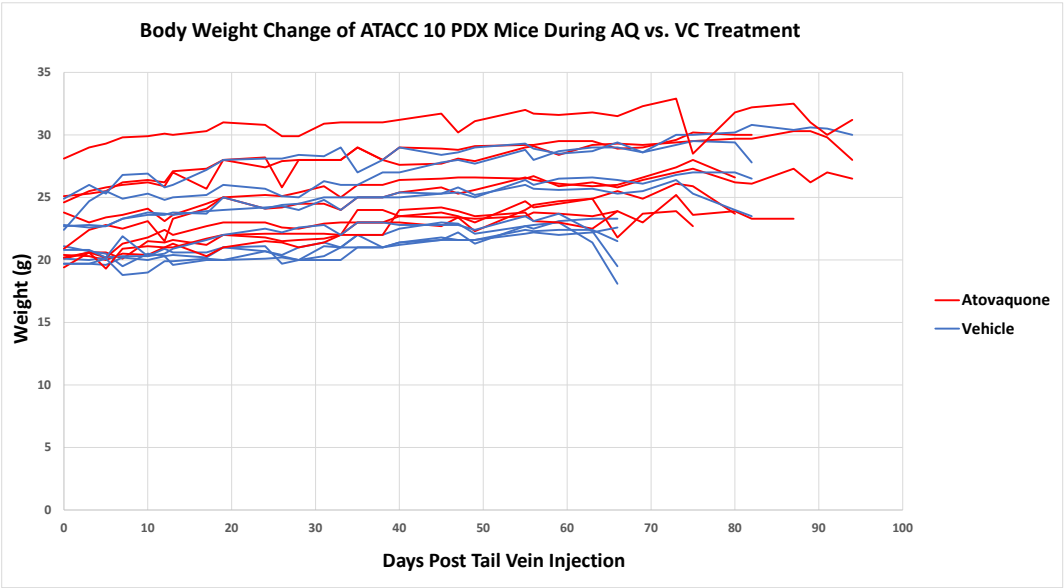

Individual Mouse Disease Burden

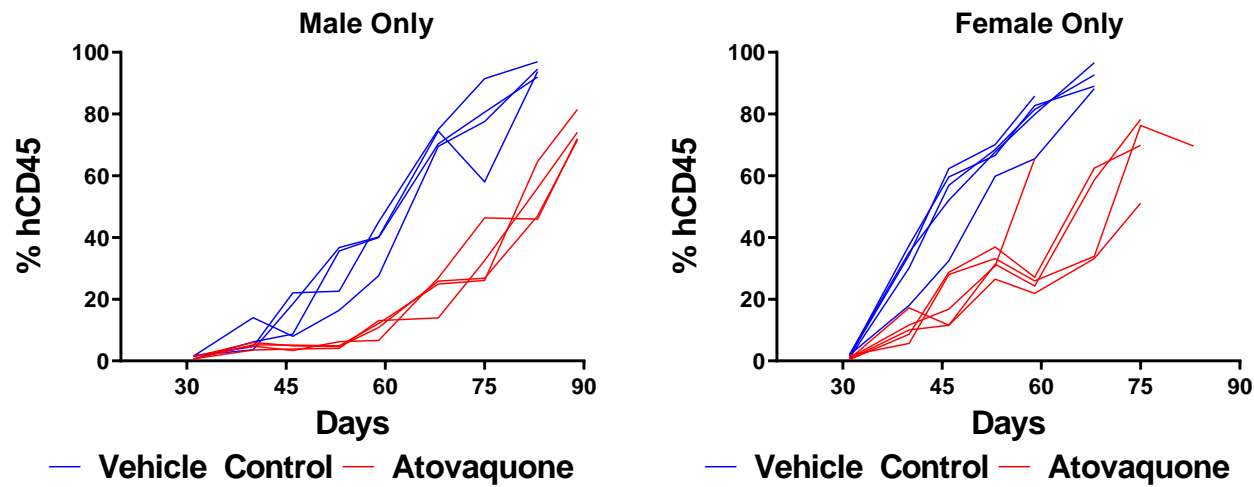

Supplementary Figure SF10

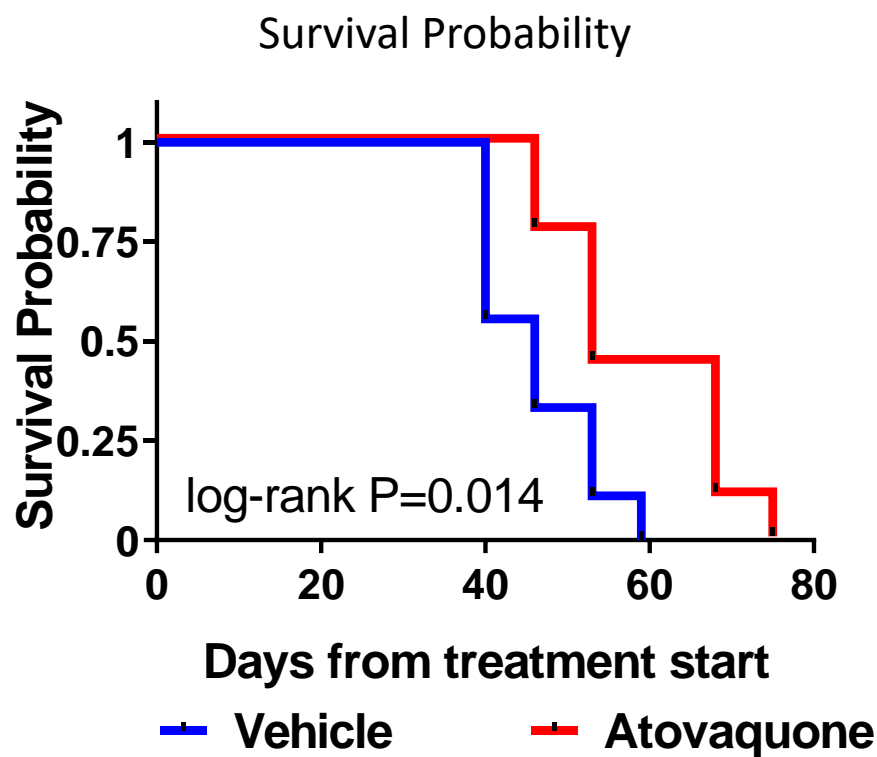

# OCR for All Study Patients

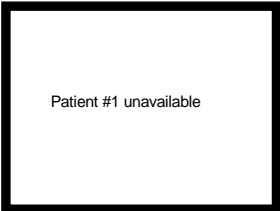

Patient #2 unavailable

Patient #3 unavailable

Patient #4 unavailable

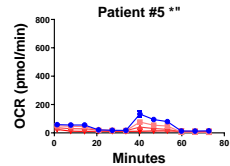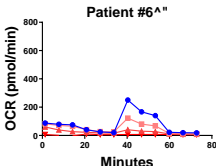

Patient #7 unavailable

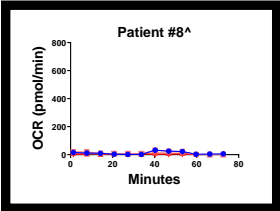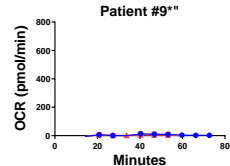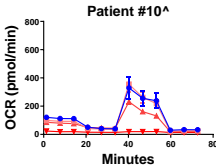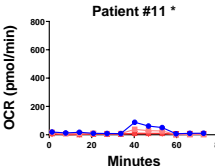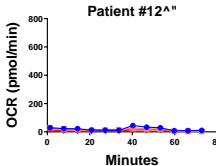

Patient #13 unavailable

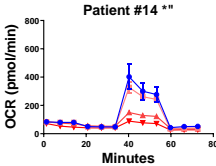

Patient #15 unavailable

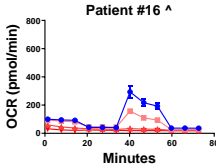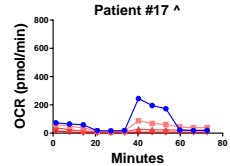

Patient #18 unavailable

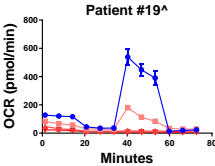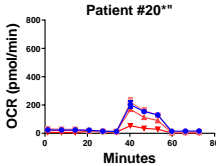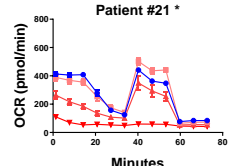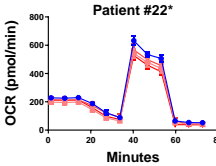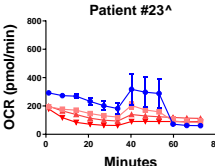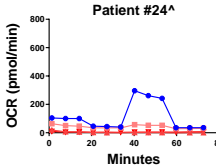

Patient #25 unavailable

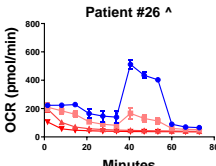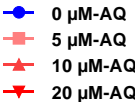

^: 100k cells  
\*: 200k cells  
": thawed sample

Supplementary Figure SF12

**A**

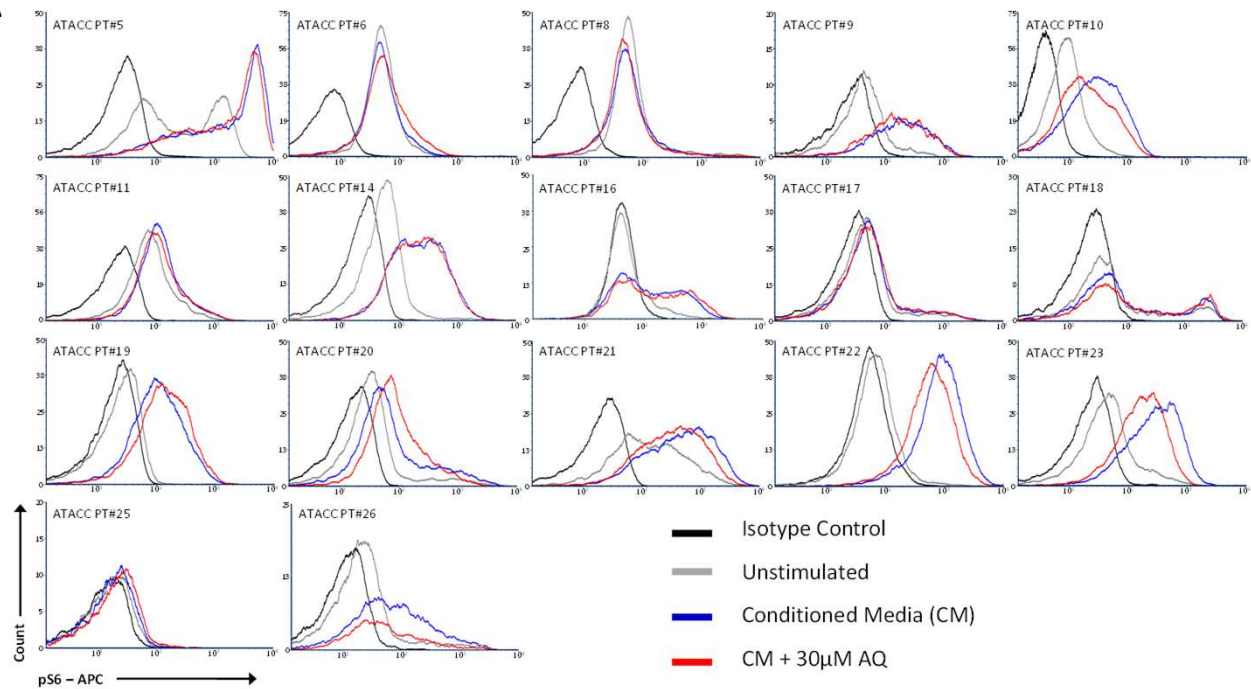

**B**

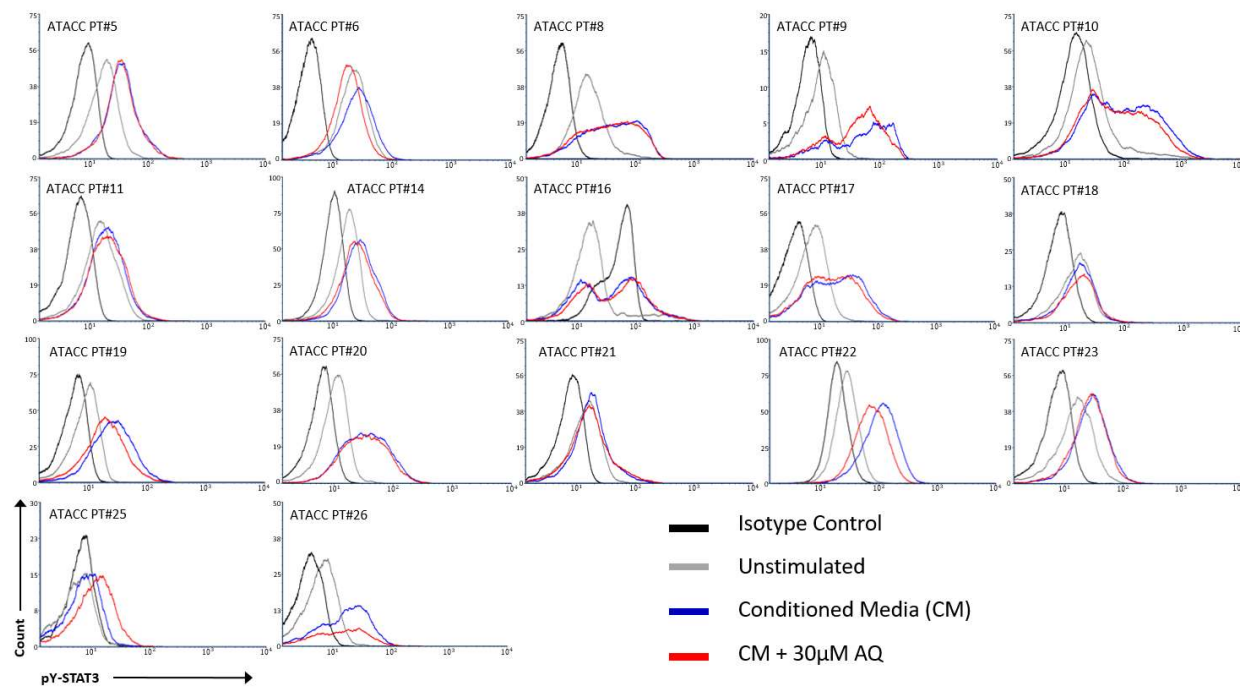



Supplementary Figure SF12

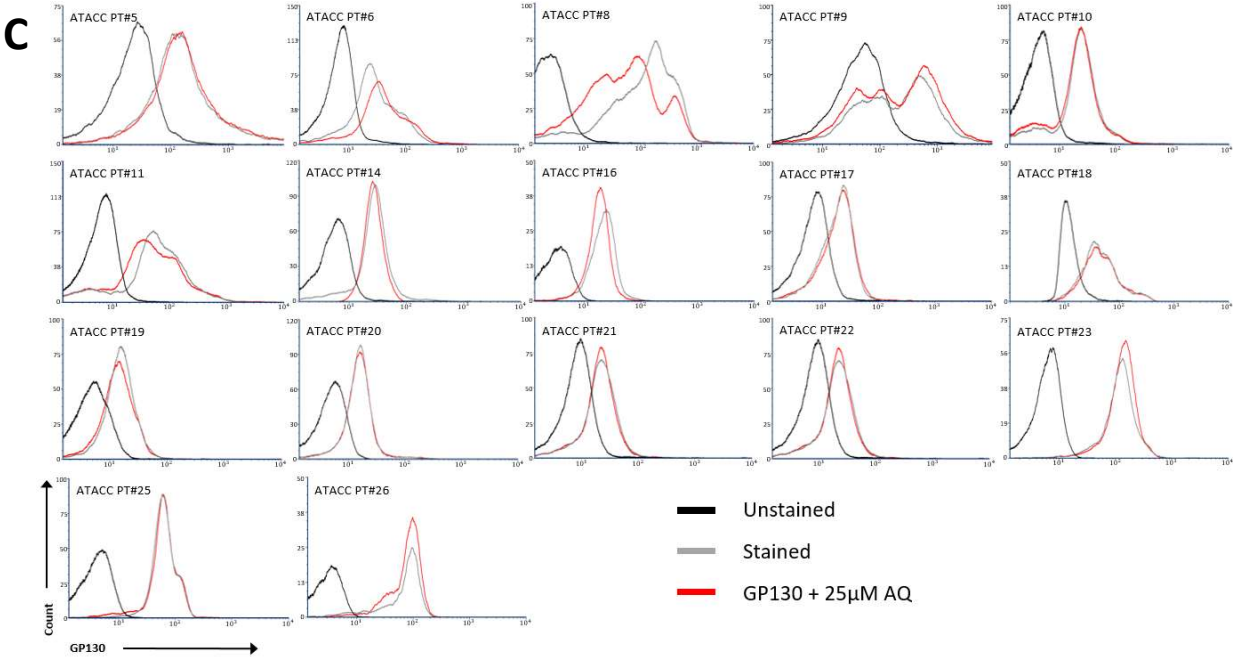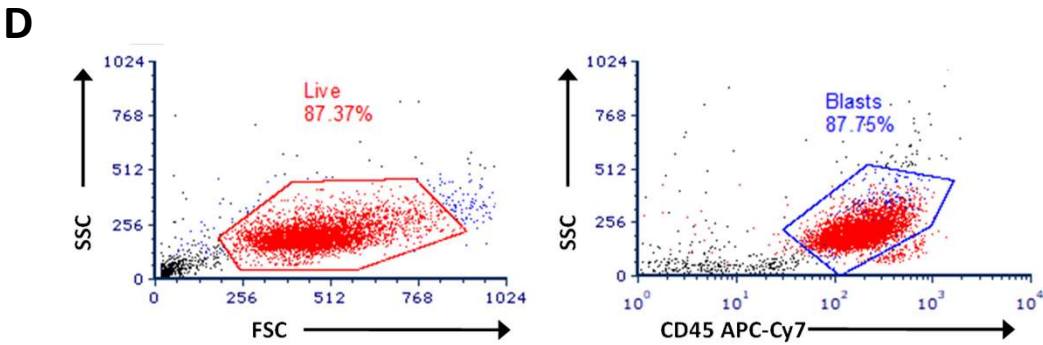

Supplement: s1 [file s1]
